# Supplementary material
Source: publisher figshare collection journal article supplement (https://karger.figshare.com/ndownloader/files/38288499)
Supplement: Supplementary file 1 [file 38288499]

**Supplemental Figure 4.** Sodium restriction and thiazide prescription on urine calcium


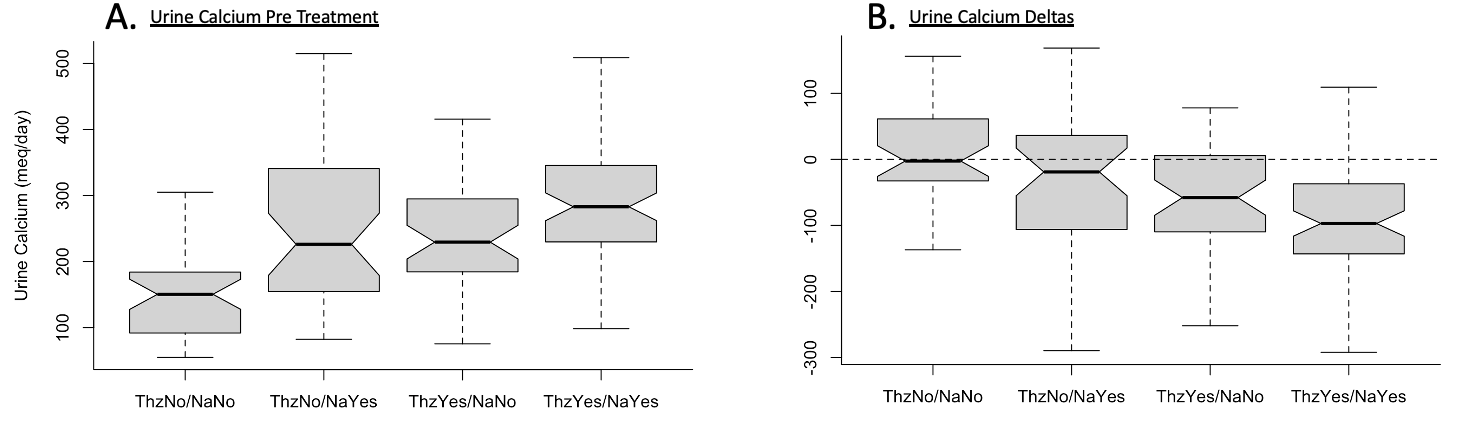


**Abbreviations**: ThzNo, no thiazide prescription; NaNo, no dietary sodium restriction; ThzYes, thiazide prescription; NaYes, dietary sodium restriction.

**Panel A**: P value comparing baseline urine calcium in the group with no thiazide prescription and no dietary sodium restriction to thiazide and dietary sodium restriction <0.001. **Panel B**: P value comparing delta urine calcium in the group with no thiazide prescription and no dietary sodium restriction to thiazide and dietary sodium restriction <0.001.
